# Supplementary material
Source: publisher site journal article supplement (https://www.dovepress.com/article/168351)

# PANCREATIC CANCER

## Chromosome Unstable (CIN) pathway

Normal duct

PanIN-1A (Pancreatic intraepithelial neoplasia)

PanIN-1B

PanIN-2

PanIN-3

Adenocarcinoma

Pancreatic ductal cell

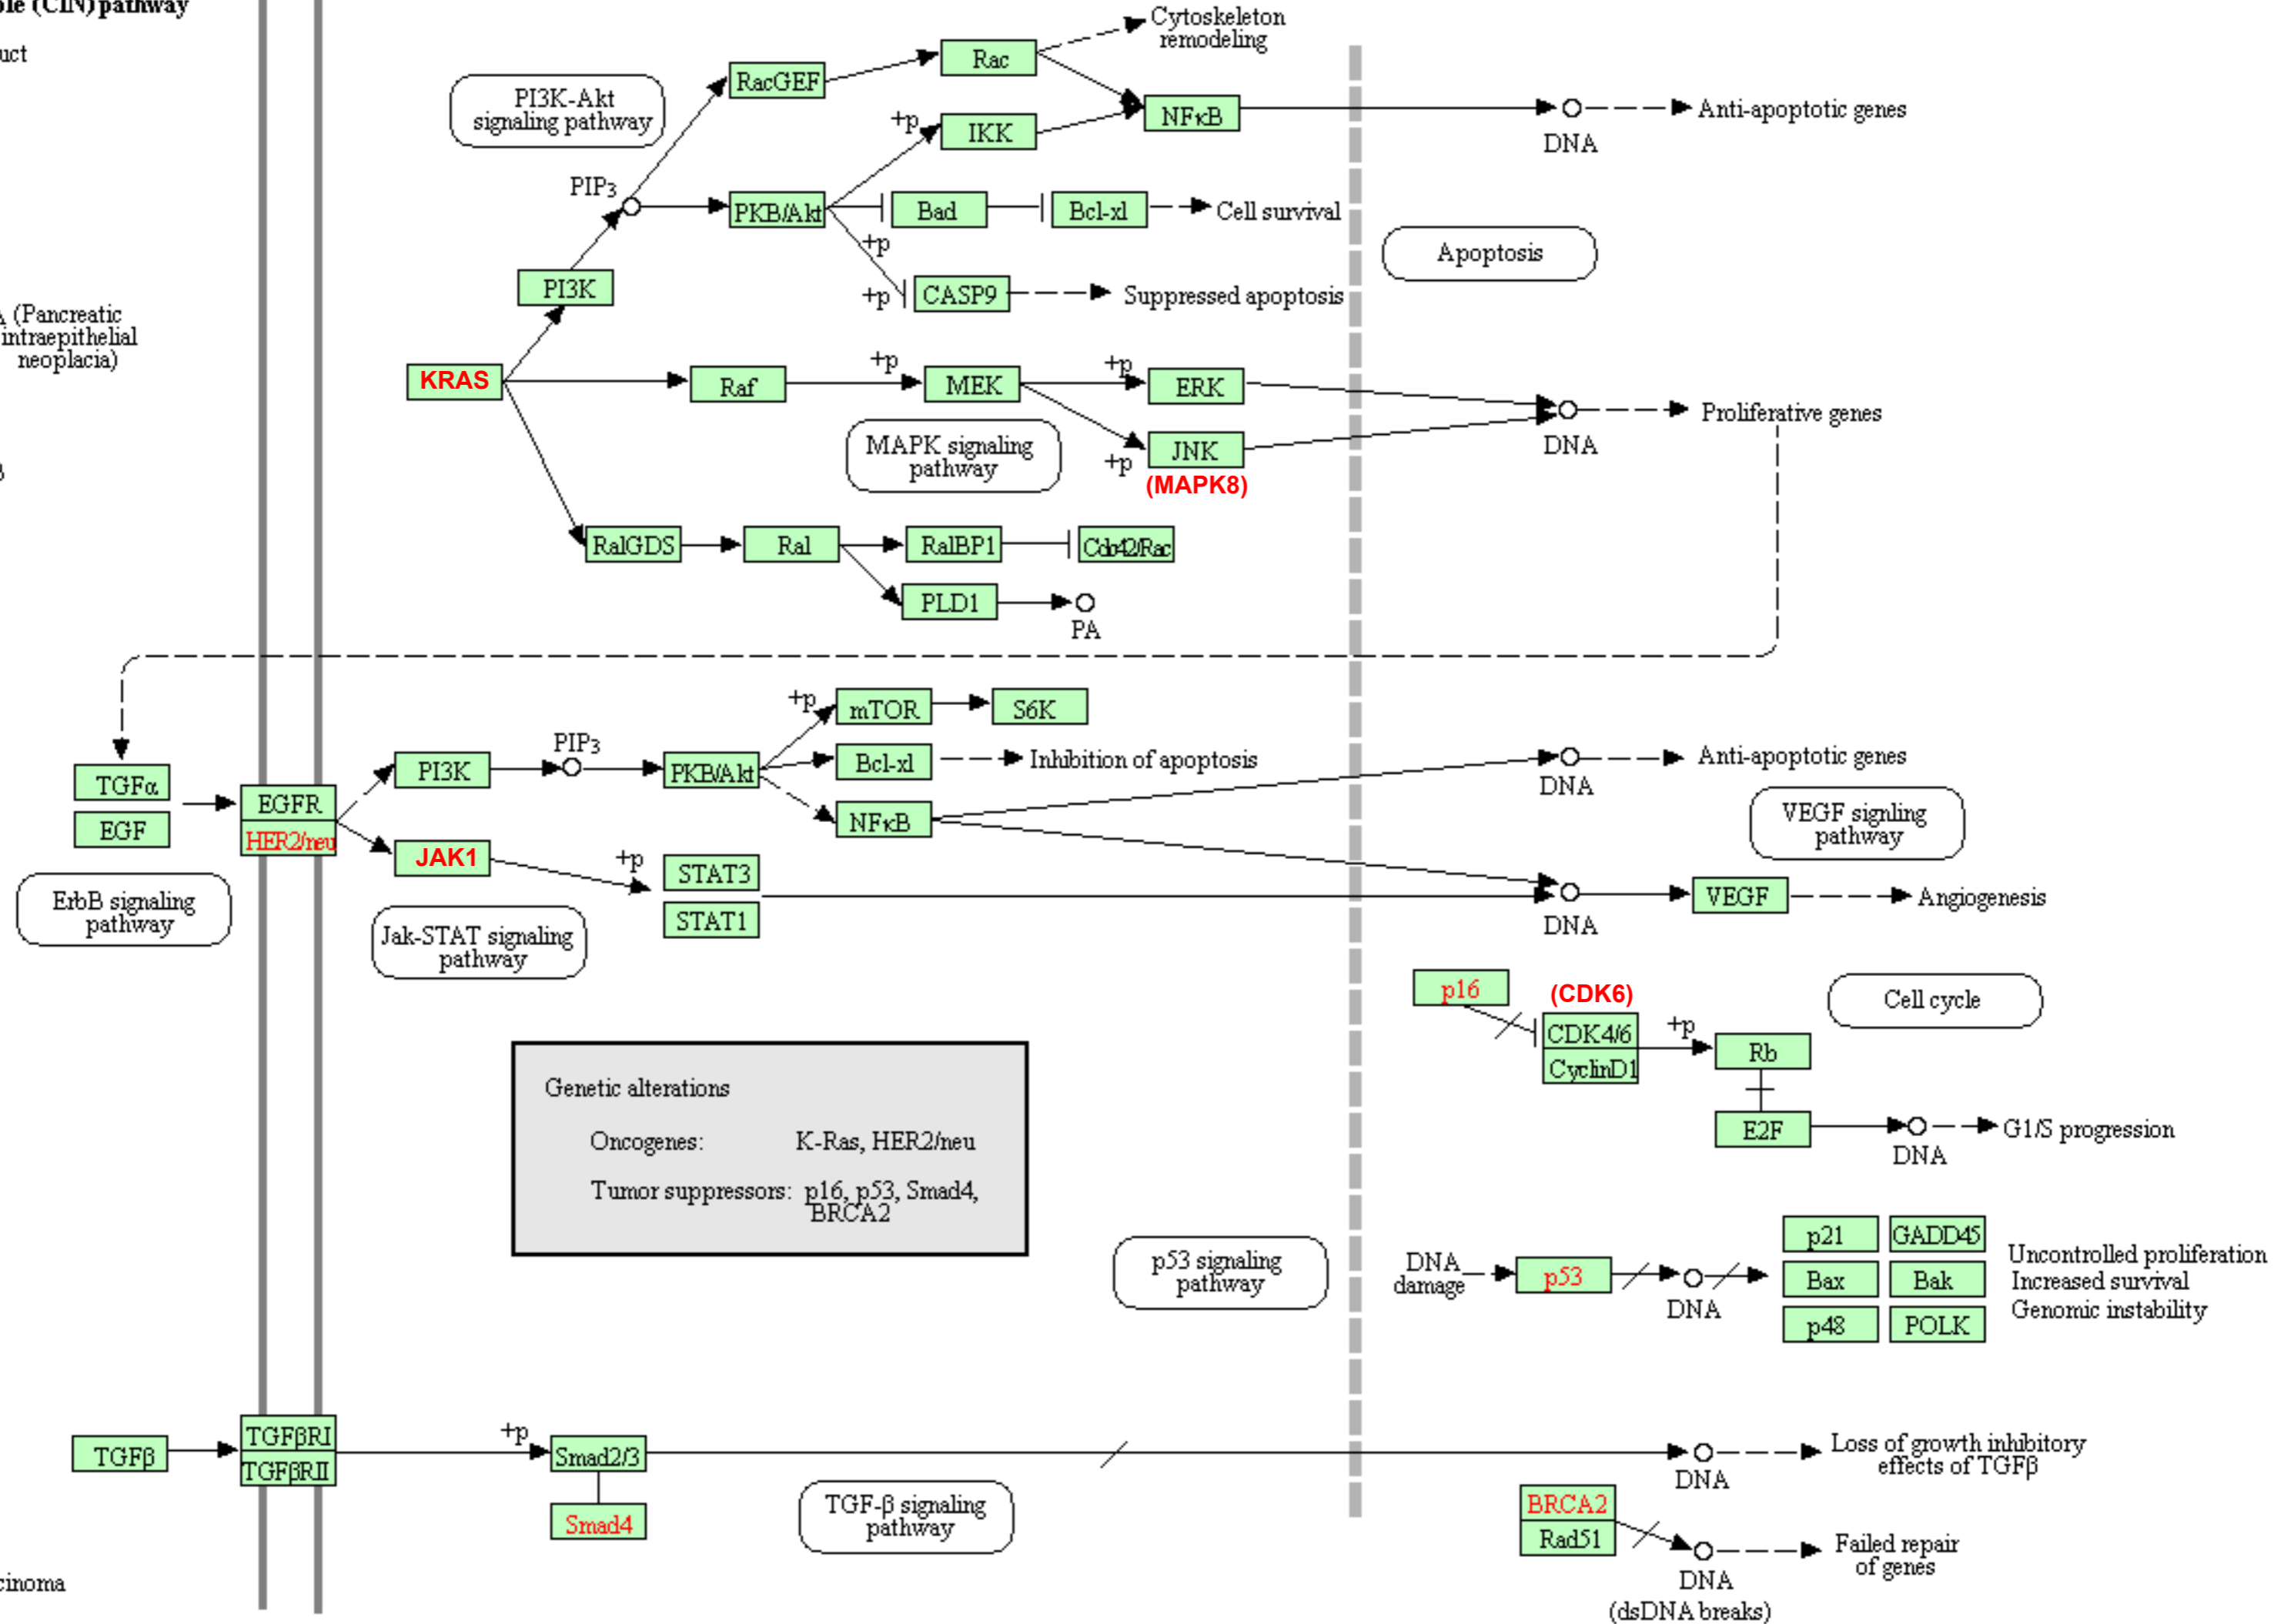

Supplement: Supplementary file 1 [file get_supplementary_file.php]
